# Supplementary material for: PPDA hybrid: a flexible and biocompatible platform for supercapacitor and strain sensing applications
Source: Royal Society of Chemistry journal article supplement (doi:10.1039/d4tc00894d), 2024-01-01
Supplement: d4tc00894d1.pdf [file d4tc00894d1.pdf]

# PPDA Hybrid: A Flexible and Biocompatible Platform for Supercapacitor and Strain Sensing Applications

Zhongwen Luo,<sup>a,b</sup> Wenchao Ye,<sup>a,b</sup> Feng Long,<sup>a,b</sup> Wenlang Liang,<sup>\*,a,b</sup> Yongxiang Leng,<sup>a,b</sup>

<sup>a</sup> Institute of Biomedical Engineering, College of Medicine, Southwest Jiaotong University, Chengdu 610031, Sichuan, China

<sup>b</sup> Key Laboratory of Advanced Technologies of Materials, Ministry of Education and School of Materials Science and Engineering, Southwest Jiaotong University, Chengdu 610031, China

**Table S1.** Contents of PPD series aerogels

| Sample           | LCA (mM) | Py (mM) | DDT/ $\gamma$ -CD (mM) |
|------------------|----------|---------|------------------------|
| PPy              | 30       | 432     | 0                      |
| PPD <sub>1</sub> | 30       | 432     | 5                      |
| PPD <sub>2</sub> | 30       | 432     | 10                     |
| PPD <sub>3</sub> | 30       | 432     | 15                     |
| PPD <sub>4</sub> | 30       | 432     | 20                     |

**Table S2.** Contents of PDDA series hybrids

| Sample             | LCA (mM) | Py (mM) | DDT/ $\gamma$ -CD (mM) | AM wt. % | BIS wt. % | AAPH wt. % |
|--------------------|----------|---------|------------------------|----------|-----------|------------|
| PA                 | 30       | 432     | 0                      | 10       | 0.1       | 1          |
| PPD <sub>1</sub> A | 30       | 432     | 5                      | 10       | 0.1       | 1          |
| PPD <sub>2</sub> A | 30       | 432     | 10                     | 10       | 0.1       | 1          |
| PPD <sub>3</sub> A | 30       | 432     | 15                     | 10       | 0.1       | 1          |

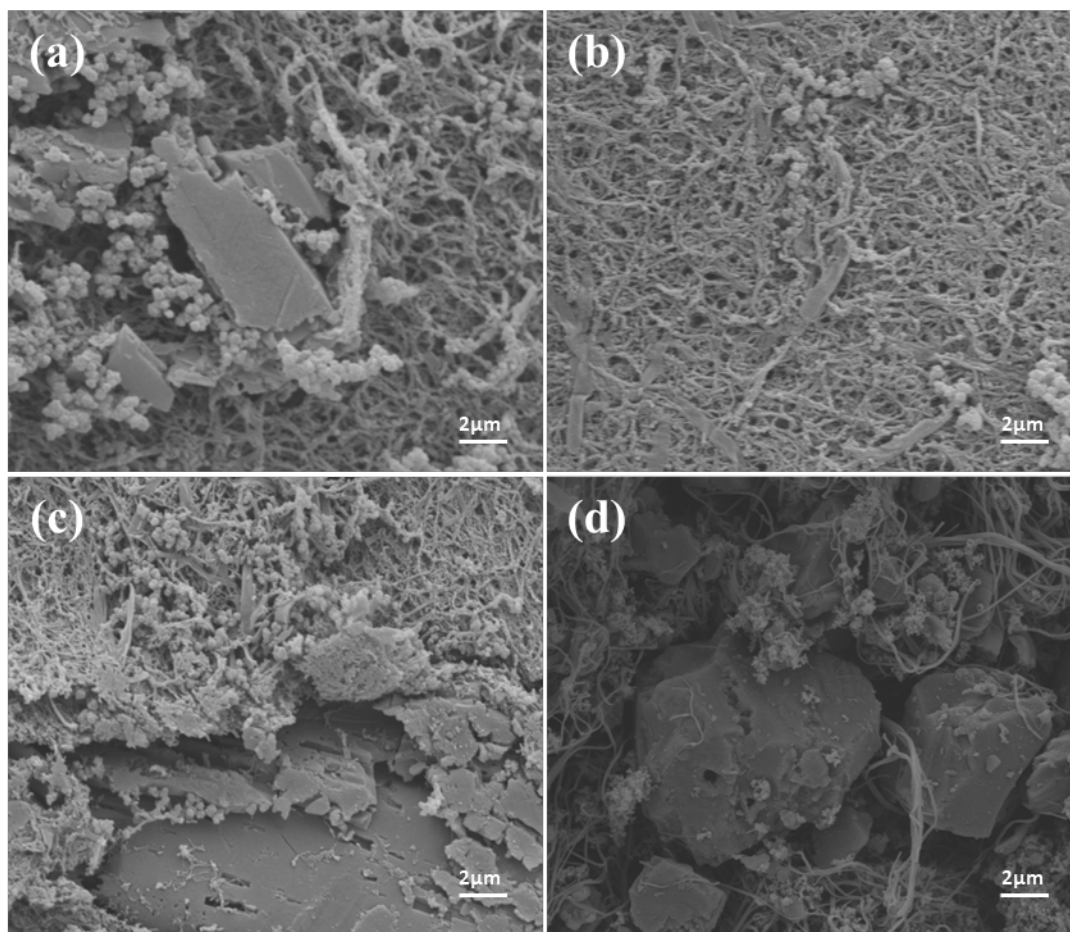

**Fig. S1** SEM images of (a) PPD<sub>1</sub>, (b) PPD<sub>2</sub>, (c) PPD<sub>3</sub>, and (d) PPD<sub>4</sub> aerogels.

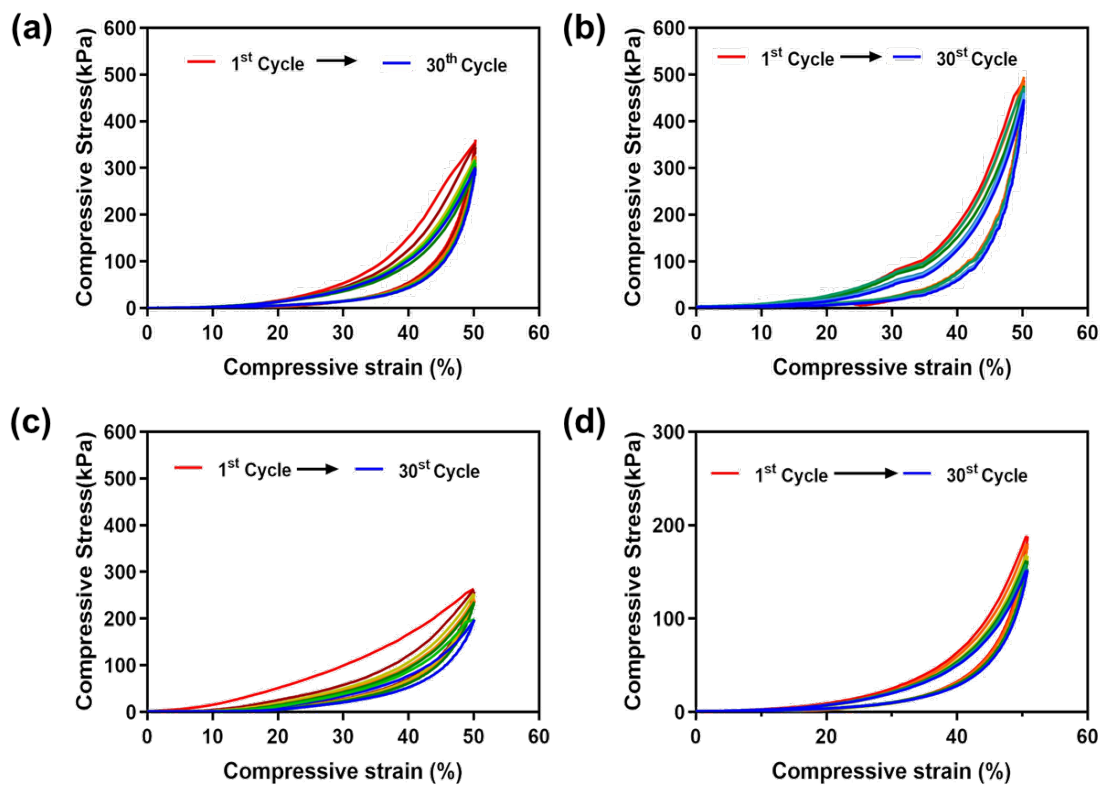

**Fig. S2** Cyclic compress stress-strain curves at 50% strain of for (a) PA, (b) PPD<sub>1</sub>A, (c) PPD<sub>3</sub>A, (d) PPD<sub>4</sub>A hybrid.

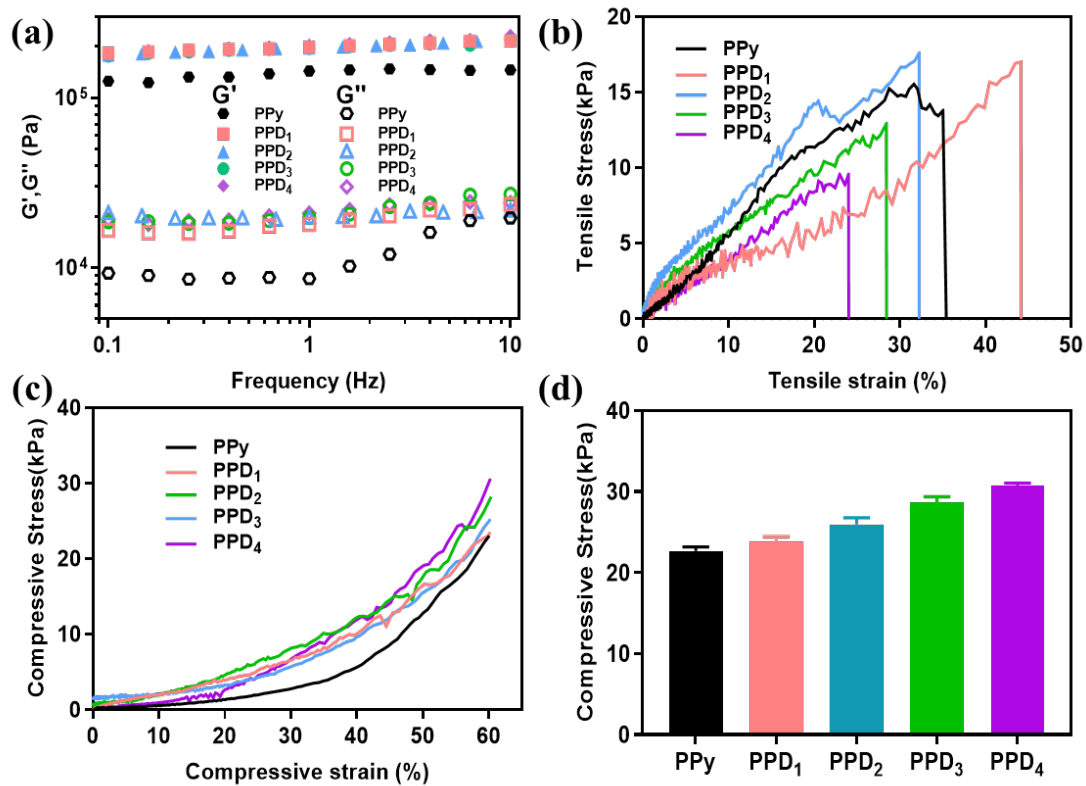

**Fig. S3** (a) Frequency sweep, (b) tensile stress-strain curves, (c) compressive stress-strain curves and (d) compressive stress of PPY aerogel and PPD series aerogels.

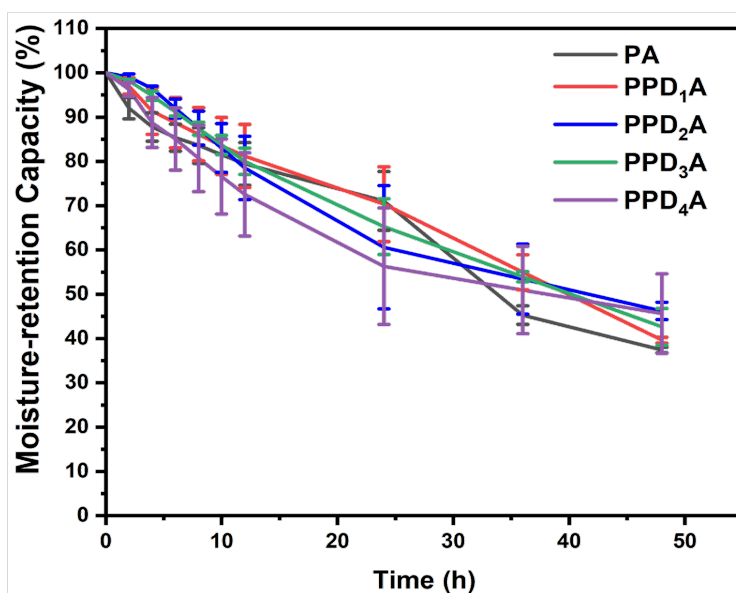

**Fig. S4** Moisture retention capacity of PA and PPD series hybrids.

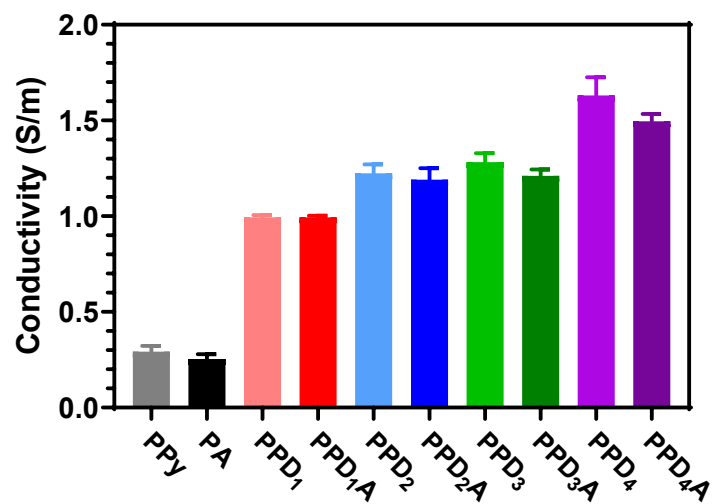

**Fig. S5** Conductivity of PPy aerogel, PPD series aerogels, PA hybrid and PPDA series hybrids.

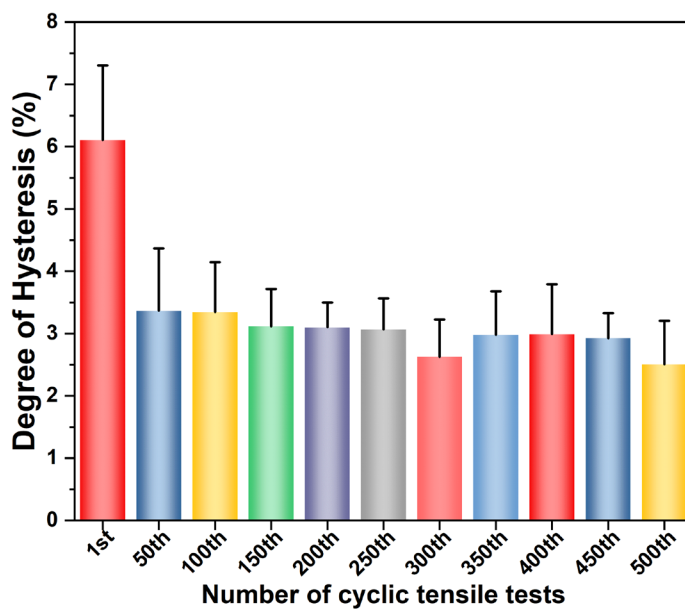

**Fig. S6** Degree of Hysteresis of PPD<sub>2</sub>A hybrid of cyclic tensile stress-strain tests at 50% strain at various cycles.
